# Supplementary material for: Genome-Wide Association Study Identifies a Potential Genomic Risk Locus at Chr11q13.1 for Acute Kidney Injury in Patients Undergoing Off-Pump Coronary Artery Bypass Grafting
Source: Research Square preprint supplement (doi:10.21203/rs.3.rs-6170946/v1), 2025-07-02

**Supplementary table 1: Top 25 most significant genes based on gene-based test based on GWAS**

| **CHR** | **START** | **STOP** | **NSNPS** | **ZSTAT** | **P** | **SYMBOL** |
| --- | --- | --- | --- | --- | --- | --- |
| 20 | 13976015 | 16033842 | 145 | 6.1804 | 3.20E-10 | MACROD2 |
| 13 | 93879095 | 95059655 | 263 | 6.117 | 4.77E-10 | GPC6 |
| 3 | 2140497 | 3099645 | 84 | 6.1122 | 4.91E-10 | CNTN4 |
| 7 | 77646393 | 79082890 | 108 | 5.8507 | 2.45E-09 | MAGI2 |
| 9 | 8314246 | 10612723 | 291 | 5.6208 | 9.50E-09 | PTPRD |
| 11 | 132284871 | 133402414 | 75 | 5.6081 | 1.02E-08 | OPCML |
| 15 | 60780483 | 61521518 | 77 | 5.5776 | 1.22E-08 | RORA |
| 14 | 33404139 | 34273382 | 65 | 5.5492 | 1.43E-08 | NPAS3 |
| 15 | 86685227 | 87572283 | 108 | 5.5213 | 1.68E-08 | AGBL1 |
| 7 | 28338940 | 28865511 | 50 | 5.3995 | 3.34E-08 | CREB5 |
| 17 | 31340105 | 32501983 | 251 | 5.3534 | 4.32E-08 | ASIC2 |
| 3 | 59735036 | 61237133 | 199 | 5.3058 | 5.61E-08 | FHIT |
| 12 | 129556270 | 130388211 | 124 | 5.2574 | 7.30E-08 | TMEM132D |
| 16 | 78133310 | 79246564 | 106 | 5.2358 | 8.21E-08 | WWOX |
| 11 | 63742092 | 63755818 | 4 | 5.235 | 8.25E-08 | AP000721.4 |
| 14 | 91006932 | 91282823 | 69 | 5.1443 | 1.34E-07 | TTC7B |
| 4 | 183065140 | 183724177 | 71 | 5.1391 | 1.38E-07 | TENM3 |
| 17 | 77085427 | 77613550 | 53 | 5.0836 | 1.85E-07 | RBFOX3 |
| 2 | 154728426 | 155310361 | 3 | 5.0559 | 2.14E-07 | GALNT13 |
| 3 | 29322473 | 30051886 | 65 | 5.0419 | 2.30E-07 | RBMS3 |
| 14 | 78708734 | 80330762 | 127 | 5.0155 | 2.64E-07 | NRXN3 |
| 7 | 3341080 | 4308632 | 68 | 5.0099 | 2.72E-07 | SDK1 |
| 11 | 83166055 | 85338966 | 63 | 5.009 | 2.74E-07 | DLG2 |
| 11 | 63753325 | 63769283 | 4 | 4.9966 | 2.92E-07 | OTUB1 |
| 10 | 13685706 | 14504141 | 55 | 4.9127 | 4.49E-07 | FRMD4A |

**Supplementary table 2: List of markers with significant p values threshold of 1e-4 in group A-AKI vs No-AKI from GWAS study**

| **#CHROM** | **POS** | **REF** | **ALT** | **OR** | **SE** | **Z_STAT** | **P** |
| --- | --- | --- | --- | --- | --- | --- | --- |
| 1 | 3323197 | T | G | 2.48792 | 0.228487 | 3.98906 | 6.63E-05 |
| 1 | 11770557 | A | G | 0.471472 | 0.183511 | -4.09727 | 4.18E-05 |
| 1 | 11770653 | G | A | 0.47197 | 0.182588 | -4.11222 | 3.92E-05 |
| 1 | 29077332 | C | T | 8.89185 | 0.552009 | 3.95851 | 7.54E-05 |
| 1 | 29085209 | T | A | 5.85217 | 0.429775 | 4.11102 | 3.94E-05 |
| 1 | 29092324 | T | C | 5.85217 | 0.429775 | 4.11102 | 3.94E-05 |
| 1 | 29103061 | C | T | 8.89185 | 0.552009 | 3.95851 | 7.54E-05 |
| 1 | 29110984 | T | C | 3.95649 | 0.343407 | 4.00503 | 6.20E-05 |
| 1 | 29111496 | C | T | 3.95649 | 0.343407 | 4.00503 | 6.20E-05 |
| 1 | 29113358 | A | G | 5.69331 | 0.427588 | 4.06768 | 4.75E-05 |
| 1 | 29114768 | C | G | 3.95649 | 0.343407 | 4.00503 | 6.20E-05 |
| 1 | 29118648 | T | C | 3.88083 | 0.34114 | 3.97506 | 7.04E-05 |
| 1 | 29119088 | C | T | 3.95649 | 0.343407 | 4.00503 | 6.20E-05 |
| 1 | 29119605 | C | T | 4.447 | 0.346966 | 4.3008 | 1.70E-05 |
| 1 | 29120304 | T | C | 3.88083 | 0.34114 | 3.97506 | 7.04E-05 |
| 1 | 29120733 | A | T | 3.88083 | 0.34114 | 3.97506 | 7.04E-05 |
| 1 | 29127253 | G | A | 5.69331 | 0.427588 | 4.06768 | 4.75E-05 |
| 1 | 29128837 | G | C | 4.447 | 0.346966 | 4.3008 | 1.70E-05 |
| 1 | 29132761 | A | G | 4.447 | 0.346966 | 4.3008 | 1.70E-05 |
| 1 | 29137753 | C | T | 3.94383 | 0.342117 | 4.01077 | 6.05E-05 |
| 1 | 29139049 | A | G | 3.94383 | 0.342117 | 4.01077 | 6.05E-05 |
| 1 | 29161794 | A | G | 3.97313 | 0.348439 | 3.95924 | 7.52E-05 |
| 1 | 62424061 | G | A | 3.3062 | 0.301116 | 3.97123 | 7.15E-05 |
| 1 | 70453637 | A | G | 3.08776 | 0.26286 | 4.28915 | 1.79E-05 |
| 1 | 74780385 | C | T | 2.09838 | 0.184318 | 4.02113 | 5.79E-05 |
| 1 | 85439059 | A | G | 2.04102 | 0.181512 | 3.9306 | 8.47E-05 |
| 1 | 85439147 | A | G | 2.04102 | 0.181512 | 3.9306 | 8.47E-05 |
| 1 | 85439304 | G | T | 2.04102 | 0.181512 | 3.9306 | 8.47E-05 |
| 1 | 85439454 | C | T | 2.07749 | 0.181083 | 4.03771 | 5.40E-05 |
| 1 | 85439669 | A | T | 2.04102 | 0.181512 | 3.9306 | 8.47E-05 |
| 1 | 85442647 | G | T | 2.01086 | 0.17875 | 3.90802 | 9.31E-05 |
| 1 | 85443420 | T | G | 2.01086 | 0.17875 | 3.90802 | 9.31E-05 |
| 1 | 85443519 | G | T | 2.01086 | 0.17875 | 3.90802 | 9.31E-05 |
| 1 | 85443830 | T | G | 2.01086 | 0.17875 | 3.90802 | 9.31E-05 |
| 1 | 85444245 | C | A | 2.01086 | 0.17875 | 3.90802 | 9.31E-05 |
| 1 | 85444401 | A | T | 2.01086 | 0.17875 | 3.90802 | 9.31E-05 |
| 1 | 85444746 | C | A | 2.01086 | 0.17875 | 3.90802 | 9.31E-05 |
| 1 | 85444929 | T | C | 2.01086 | 0.17875 | 3.90802 | 9.31E-05 |
| 1 | 85445031 | T | C | 2.02536 | 0.17932 | 3.93569 | 8.30E-05 |
| 1 | 85445384 | T | C | 2.00687 | 0.179019 | 3.89107 | 9.98E-05 |
| 1 | 85445746 | C | T | 2.01086 | 0.17875 | 3.90802 | 9.31E-05 |
| 1 | 102201856 | T | C | 2.20532 | 0.199815 | 3.95803 | 7.56E-05 |
| 1 | 102211253 | C | T | 2.35004 | 0.200827 | 4.25458 | 2.09E-05 |
| 1 | 102213387 | C | T | 2.351 | 0.201629 | 4.23968 | 2.24E-05 |
| 1 | 102217557 | G | A | 2.35749 | 0.201479 | 4.2565 | 2.08E-05 |
| 1 | 102217914 | C | A | 2.35749 | 0.201479 | 4.2565 | 2.08E-05 |
| 1 | 102217915 | C | A | 2.35749 | 0.201479 | 4.2565 | 2.08E-05 |
| 1 | 102223286 | A | G | 2.34397 | 0.202243 | 4.21201 | 2.53E-05 |
| 1 | 102228731 | G | A | 2.27103 | 0.202101 | 4.05855 | 4.94E-05 |
| 1 | 102229920 | G | A | 2.25971 | 0.202278 | 4.03026 | 5.57E-05 |
| 1 | 102243101 | G | A | 2.26384 | 0.194014 | 4.21135 | 2.54E-05 |
| 1 | 157422751 | G | A | 2.22107 | 0.201837 | 3.95363 | 7.70E-05 |
| 1 | 157426235 | C | T | 2.21436 | 0.201912 | 3.93717 | 8.24E-05 |
| 1 | 157431294 | G | A | 2.22412 | 0.201752 | 3.96209 | 7.43E-05 |
| 1 | 157443532 | C | T | 2.26998 | 0.204582 | 4.00706 | 6.15E-05 |
| 1 | 158375823 | T | C | 0.376121 | 0.243192 | -4.02087 | 5.80E-05 |
| 1 | 158376120 | C | T | 0.377696 | 0.242789 | -4.01033 | 6.06E-05 |
| 1 | 159068491 | C | T | 8.2741 | 0.488832 | 4.32282 | 1.54E-05 |
| 1 | 166351133 | T | C | 2.07697 | 0.187486 | 3.89847 | 9.68E-05 |
| 1 | 166353381 | G | A | 2.11101 | 0.186553 | 4.00512 | 6.20E-05 |
| 1 | 166359648 | A | G | 2.10614 | 0.186094 | 4.0026 | 6.27E-05 |
| 1 | 192616188 | C | A | 5.21818 | 0.406303 | 4.06629 | 4.78E-05 |
| 1 | 192617601 | G | A | 5.21818 | 0.406303 | 4.06629 | 4.78E-05 |
| 1 | 192619608 | G | A | 5.06103 | 0.404567 | 4.00816 | 6.12E-05 |
| 1 | 192620166 | G | A | 5.06103 | 0.404567 | 4.00816 | 6.12E-05 |
| 1 | 192625793 | G | A | 5.23534 | 0.406906 | 4.06834 | 4.73E-05 |
| 1 | 192625901 | C | T | 5.23534 | 0.406906 | 4.06834 | 4.73E-05 |
| 1 | 192627431 | G | A | 5.23534 | 0.406906 | 4.06834 | 4.73E-05 |
| 1 | 192627704 | T | C | 5.23534 | 0.406906 | 4.06834 | 4.73E-05 |
| 1 | 192629065 | C | A | 4.90639 | 0.403205 | 3.94473 | 7.99E-05 |
| 1 | 192630080 | A | G | 4.90639 | 0.403205 | 3.94473 | 7.99E-05 |
| 1 | 204622064 | C | A | 2.26191 | 0.184484 | 4.42427 | 9.68E-06 |
| 1 | 204623416 | T | C | 2.24995 | 0.183878 | 4.41002 | 1.03E-05 |
| 1 | 204624438 | C | T | 2.15028 | 0.185292 | 4.13184 | 3.60E-05 |
| 1 | 204625077 | G | A | 2.19021 | 0.183129 | 4.28112 | 1.86E-05 |
| 1 | 204626358 | G | A | 2.08175 | 0.181853 | 4.03189 | 5.53E-05 |
| 1 | 204626806 | G | A | 2.08559 | 0.181736 | 4.04462 | 5.24E-05 |
| 1 | 205554095 | A | C | 0.242414 | 0.335867 | -4.21925 | 2.45E-05 |
| 1 | 242542449 | C | T | 3.49671 | 0.315392 | 3.9691 | 7.21E-05 |
| 1 | 249085433 | C | T | 11.0133 | 0.523465 | 4.58313 | 4.58E-06 |
| 1 | 249086594 | A | C | 11.0133 | 0.523465 | 4.58313 | 4.58E-06 |
| 1 | 249127640 | A | G | 7.16043 | 0.489558 | 4.02112 | 5.79E-05 |
| 2 | 23357040 | T | C | 8.67256 | 0.463615 | 4.6594 | 3.17E-06 |
| 2 | 23363389 | C | A | 5.98498 | 0.432976 | 4.13245 | 3.59E-05 |
| 2 | 35348725 | A | G | 11.479 | 0.581691 | 4.19555 | 2.72E-05 |
| 2 | 36599197 | G | A | 4.55408 | 0.376502 | 4.0266 | 5.66E-05 |
| 2 | 38382618 | C | T | 3.03952 | 0.258089 | 4.30742 | 1.65E-05 |
| 2 | 74271577 | C | T | 2.96745 | 0.262161 | 4.14899 | 3.34E-05 |
| 2 | 74279878 | T | C | 2.93198 | 0.262035 | 4.10508 | 4.04E-05 |
| 2 | 74285160 | C | G | 2.87543 | 0.261943 | 4.03218 | 5.53E-05 |
| 2 | 74419845 | C | T | 10.671 | 0.496428 | 4.76912 | 1.85E-06 |
| 2 | 74844472 | G | T | 7.42974 | 0.506417 | 3.96016 | 7.49E-05 |
| 2 | 74883327 | G | A | 5.65236 | 0.430834 | 4.02028 | 5.81E-05 |
| 2 | 86994290 | G | A | 2.83509 | 0.261183 | 3.98982 | 6.61E-05 |
| 2 | 110421948 | C | T | 7.23558 | 0.495864 | 3.99103 | 6.58E-05 |
| 2 | 110422404 | G | A | 7.76027 | 0.509162 | 4.02429 | 5.71E-05 |
| 2 | 110422614 | A | G | 7.76027 | 0.509162 | 4.02429 | 5.71E-05 |
| 2 | 140850166 | G | A | 2.96005 | 0.245475 | 4.42085 | 9.83E-06 |
| 2 | 140850333 | C | T | 2.94244 | 0.245439 | 4.39717 | 1.10E-05 |
| 2 | 140852421 | G | C | 2.96005 | 0.245475 | 4.42085 | 9.83E-06 |
| 2 | 140855997 | G | A | 2.96005 | 0.245475 | 4.42085 | 9.83E-06 |
| 2 | 140857126 | C | A | 2.96005 | 0.245475 | 4.42085 | 9.83E-06 |
| 2 | 140857352 | G | A | 2.96005 | 0.245475 | 4.42085 | 9.83E-06 |
| 2 | 140858182 | T | A | 2.96005 | 0.245475 | 4.42085 | 9.83E-06 |
| 2 | 140858451 | T | C | 2.89514 | 0.245064 | 4.33777 | 1.44E-05 |
| 2 | 140860442 | A | C | 2.96005 | 0.245475 | 4.42085 | 9.83E-06 |
| 2 | 140861129 | A | G | 2.96005 | 0.245475 | 4.42085 | 9.83E-06 |
| 2 | 140862456 | A | C | 3.11474 | 0.244465 | 4.64748 | 3.36E-06 |
| 2 | 140862856 | A | C | 2.68126 | 0.244094 | 4.04061 | 5.33E-05 |
| 2 | 140863838 | T | C | 2.96005 | 0.245475 | 4.42085 | 9.83E-06 |
| 2 | 140864021 | A | G | 2.96005 | 0.245475 | 4.42085 | 9.83E-06 |
| 2 | 140864582 | A | G | 2.96005 | 0.245475 | 4.42085 | 9.83E-06 |
| 2 | 140866819 | A | G | 2.86063 | 0.247119 | 4.25319 | 2.11E-05 |
| 2 | 140868224 | C | G | 2.78224 | 0.255792 | 4.00036 | 6.32E-05 |
| 2 | 140880629 | C | T | 2.47529 | 0.22549 | 4.0195 | 5.83E-05 |
| 2 | 140881020 | T | C | 2.43033 | 0.226757 | 3.91621 | 9.00E-05 |
| 2 | 156641672 | C | T | 7.98951 | 0.51281 | 4.05244 | 5.07E-05 |
| 2 | 171477858 | C | A | 3.1558 | 0.290989 | 3.94944 | 7.83E-05 |
| 2 | 187479648 | A | G | 5.41474 | 0.372185 | 4.5384 | 5.67E-06 |
| 2 | 188724213 | A | C | 5.81782 | 0.379082 | 4.64524 | 3.40E-06 |
| 2 | 188789289 | C | T | 4.11266 | 0.346473 | 4.08132 | 4.48E-05 |
| 2 | 190802048 | A | G | 5.38904 | 0.411485 | 4.09339 | 4.25E-05 |
| 2 | 190804626 | C | A | 4.33694 | 0.352836 | 4.15821 | 3.21E-05 |
| 2 | 190820051 | G | A | 5.38904 | 0.411485 | 4.09339 | 4.25E-05 |
| 2 | 190820236 | T | C | 4.1683 | 0.360638 | 3.95828 | 7.55E-05 |
| 2 | 190843508 | C | T | 5.38904 | 0.411485 | 4.09339 | 4.25E-05 |
| 2 | 190864299 | A | G | 5.38904 | 0.411485 | 4.09339 | 4.25E-05 |
| 2 | 190868361 | C | T | 5.38904 | 0.411485 | 4.09339 | 4.25E-05 |
| 2 | 219901834 | C | T | 4.81707 | 0.380023 | 4.13703 | 3.52E-05 |
| 2 | 230383471 | C | A | 2.26548 | 0.190051 | 4.30298 | 1.69E-05 |
| 3 | 3597016 | C | T | 10.8688 | 0.572842 | 4.16501 | 3.11E-05 |
| 3 | 4789051 | T | G | 0.352138 | 0.264671 | -3.94351 | 8.03E-05 |
| 3 | 26694403 | C | T | 2.2082 | 0.196726 | 4.02681 | 5.65E-05 |
| 3 | 26695092 | A | G | 2.21106 | 0.196632 | 4.03532 | 5.45E-05 |
| 3 | 87728575 | A | G | 0.373348 | 0.242873 | -4.05663 | 4.98E-05 |
| 3 | 87734097 | G | A | 0.34136 | 0.251069 | -4.28096 | 1.86E-05 |
| 3 | 87734943 | C | A | 0.36372 | 0.244892 | -4.12986 | 3.63E-05 |
| 3 | 87737222 | C | T | 0.357496 | 0.245616 | -4.18796 | 2.81E-05 |
| 3 | 87737267 | A | G | 0.357496 | 0.245616 | -4.18796 | 2.81E-05 |
| 3 | 87742058 | A | G | 0.377091 | 0.242711 | -4.01824 | 5.86E-05 |
| 3 | 87744310 | C | T | 0.351782 | 0.249218 | -4.19208 | 2.76E-05 |
| 3 | 87751890 | C | G | 0.394702 | 0.23823 | -3.90221 | 9.53E-05 |
| 3 | 87752346 | T | C | 0.391615 | 0.238295 | -3.9341 | 8.35E-05 |
| 3 | 87753894 | A | G | 0.395663 | 0.238215 | -3.89225 | 9.93E-05 |
| 3 | 87761841 | T | C | 0.339361 | 0.270483 | -3.9954 | 6.46E-05 |
| 3 | 87762857 | G | A | 0.337317 | 0.271445 | -4.0035 | 6.24E-05 |
| 3 | 87764884 | T | G | 0.334628 | 0.271312 | -4.03496 | 5.46E-05 |
| 3 | 87766866 | G | A | 0.353929 | 0.266303 | -3.9003 | 9.61E-05 |
| 3 | 137019298 | C | G | 11.4983 | 0.578565 | 4.22113 | 2.43E-05 |
| 3 | 137026336 | A | G | 11.4983 | 0.578565 | 4.22113 | 2.43E-05 |
| 3 | 137062514 | A | G | 12.7161 | 0.585975 | 4.33955 | 1.43E-05 |
| 3 | 137079773 | G | A | 13.5266 | 0.639286 | 4.07432 | 4.61E-05 |
| 3 | 137080101 | C | G | 13.5266 | 0.639286 | 4.07432 | 4.61E-05 |
| 3 | 137100227 | C | T | 12.9039 | 0.637383 | 4.01255 | 6.01E-05 |
| 3 | 141145645 | C | G | 2.84088 | 0.266177 | 3.92263 | 8.76E-05 |
| 3 | 144101037 | T | C | 5.27732 | 0.386234 | 4.30676 | 1.66E-05 |
| 3 | 144105107 | A | C | 6.76308 | 0.43977 | 4.34654 | 1.38E-05 |
| 3 | 144107316 | C | T | 6.08281 | 0.436297 | 4.13816 | 3.50E-05 |
| 3 | 144107986 | A | G | 6.76308 | 0.43977 | 4.34654 | 1.38E-05 |
| 3 | 144109902 | A | G | 5.73916 | 0.432177 | 4.04305 | 5.28E-05 |
| 3 | 144112915 | A | G | 6.08281 | 0.436297 | 4.13816 | 3.50E-05 |
| 3 | 144112982 | G | T | 6.76308 | 0.43977 | 4.34654 | 1.38E-05 |
| 3 | 144113258 | G | C | 6.76308 | 0.43977 | 4.34654 | 1.38E-05 |
| 3 | 144113314 | A | G | 6.76308 | 0.43977 | 4.34654 | 1.38E-05 |
| 3 | 144114351 | C | T | 6.76308 | 0.43977 | 4.34654 | 1.38E-05 |
| 3 | 144114653 | T | A | 6.76308 | 0.43977 | 4.34654 | 1.38E-05 |
| 3 | 144115519 | A | T | 6.76308 | 0.43977 | 4.34654 | 1.38E-05 |
| 3 | 144115917 | C | A | 6.76308 | 0.43977 | 4.34654 | 1.38E-05 |
| 3 | 144118718 | G | A | 7.61069 | 0.449491 | 4.51523 | 6.32E-06 |
| 3 | 144120321 | T | C | 7.08975 | 0.443789 | 4.41347 | 1.02E-05 |
| 3 | 144121546 | T | A | 6.77875 | 0.444947 | 4.30117 | 1.70E-05 |
| 3 | 144125571 | T | A | 7.08975 | 0.443789 | 4.41347 | 1.02E-05 |
| 3 | 144132728 | G | A | 7.61069 | 0.449491 | 4.51523 | 6.32E-06 |
| 3 | 144136665 | A | C | 7.61069 | 0.449491 | 4.51523 | 6.32E-06 |
| 3 | 144139126 | T | G | 7.61069 | 0.449491 | 4.51523 | 6.32E-06 |
| 3 | 144139757 | G | A | 7.61069 | 0.449491 | 4.51523 | 6.32E-06 |
| 3 | 144142676 | C | G | 7.61069 | 0.449491 | 4.51523 | 6.32E-06 |
| 3 | 144145062 | T | A | 6.77875 | 0.444947 | 4.30117 | 1.70E-05 |
| 3 | 144147334 | C | T | 7.61069 | 0.449491 | 4.51523 | 6.32E-06 |
| 3 | 144153017 | T | C | 7.61069 | 0.449491 | 4.51523 | 6.32E-06 |
| 3 | 144153226 | G | A | 7.61069 | 0.449491 | 4.51523 | 6.32E-06 |
| 3 | 144156503 | C | T | 7.61069 | 0.449491 | 4.51523 | 6.32E-06 |
| 3 | 144160736 | C | T | 7.61069 | 0.449491 | 4.51523 | 6.32E-06 |
| 3 | 144161943 | T | A | 7.61069 | 0.449491 | 4.51523 | 6.32E-06 |
| 3 | 144162803 | G | A | 7.61069 | 0.449491 | 4.51523 | 6.32E-06 |
| 3 | 144163491 | A | C | 7.61069 | 0.449491 | 4.51523 | 6.32E-06 |
| 3 | 144167706 | T | C | 8.21565 | 0.456291 | 4.61557 | 3.92E-06 |
| 3 | 146727775 | T | C | 3.92717 | 0.351561 | 3.89099 | 9.98E-05 |
| 3 | 168439358 | C | T | 2.02088 | 0.179569 | 3.91789 | 8.93E-05 |
| 3 | 168451781 | C | T | 2.01396 | 0.179725 | 3.8954 | 9.80E-05 |
| 3 | 168512427 | T | C | 8.10013 | 0.485127 | 4.31202 | 1.62E-05 |
| 4 | 13009987 | A | G | 0.477241 | 0.188583 | -3.92259 | 8.76E-05 |
| 4 | 60875205 | G | A | 5.01958 | 0.411046 | 3.92498 | 8.67E-05 |
| 4 | 60878444 | A | G | 5.01958 | 0.411046 | 3.92498 | 8.67E-05 |
| 4 | 60879548 | A | G | 5.01958 | 0.411046 | 3.92498 | 8.67E-05 |
| 4 | 60879921 | T | G | 5.01958 | 0.411046 | 3.92498 | 8.67E-05 |
| 4 | 60880553 | G | C | 5.01958 | 0.411046 | 3.92498 | 8.67E-05 |
| 4 | 60884752 | C | T | 5.01958 | 0.411046 | 3.92498 | 8.67E-05 |
| 4 | 60885848 | T | G | 5.01958 | 0.411046 | 3.92498 | 8.67E-05 |
| 4 | 71907670 | T | C | 2.27933 | 0.205655 | 4.00615 | 6.17E-05 |
| 4 | 71913507 | C | T | 2.25105 | 0.19904 | 4.07654 | 4.57E-05 |
| 4 | 71915269 | A | G | 2.26083 | 0.192703 | 4.23311 | 2.30E-05 |
| 4 | 71915961 | T | C | 2.17658 | 0.197493 | 3.93814 | 8.21E-05 |
| 4 | 71916791 | G | T | 2.17118 | 0.19771 | 3.92126 | 8.81E-05 |
| 4 | 71917052 | T | G | 2.21448 | 0.199052 | 3.99402 | 6.50E-05 |
| 4 | 71917988 | A | G | 2.25955 | 0.201039 | 4.05477 | 5.02E-05 |
| 4 | 71918210 | T | C | 2.30676 | 0.202448 | 4.12869 | 3.65E-05 |
| 4 | 71918767 | T | C | 2.25955 | 0.201039 | 4.05477 | 5.02E-05 |
| 4 | 71919167 | C | G | 2.17118 | 0.19771 | 3.92126 | 8.81E-05 |
| 4 | 109408608 | G | A | 2.18139 | 0.199669 | 3.90629 | 9.37E-05 |
| 4 | 109434055 | C | T | 2.09235 | 0.189247 | 3.9012 | 9.57E-05 |
| 4 | 109434456 | G | A | 2.27841 | 0.191411 | 4.30214 | 1.69E-05 |
| 4 | 109441100 | G | C | 2.23679 | 0.193116 | 4.1687 | 3.06E-05 |
| 4 | 109447252 | G | A | 2.14795 | 0.193409 | 3.95283 | 7.72E-05 |
| 4 | 109461985 | A | G | 2.05487 | 0.18229 | 3.95093 | 7.78E-05 |
| 4 | 109466347 | A | G | 2.44062 | 0.196539 | 4.53982 | 5.63E-06 |
| 4 | 109467764 | T | A | 2.22295 | 0.180588 | 4.42353 | 9.71E-06 |
| 4 | 109470762 | G | T | 2.2325 | 0.178317 | 4.5039 | 6.67E-06 |
| 4 | 109473713 | A | T | 2.18408 | 0.172138 | 4.53821 | 5.67E-06 |
| 4 | 114754210 | T | C | 9.98994 | 0.575566 | 3.99881 | 6.37E-05 |
| 4 | 114771678 | C | T | 11.4281 | 0.592386 | 4.11231 | 3.92E-05 |
| 4 | 125920595 | G | A | 2.69117 | 0.232273 | 4.26212 | 2.02E-05 |
| 4 | 125921345 | C | A | 2.69117 | 0.232273 | 4.26212 | 2.02E-05 |
| 4 | 125925433 | C | T | 2.67865 | 0.231917 | 4.24857 | 2.15E-05 |
| 4 | 125931866 | T | C | 2.67865 | 0.231917 | 4.24857 | 2.15E-05 |
| 4 | 125932789 | A | G | 2.46859 | 0.231845 | 3.89764 | 9.71E-05 |
| 4 | 135001547 | T | C | 4.98641 | 0.368382 | 4.36154 | 1.29E-05 |
| 4 | 135180749 | G | A | 4.32379 | 0.372342 | 3.93223 | 8.42E-05 |
| 4 | 143170291 | A | G | 6.82471 | 0.477187 | 4.02473 | 5.70E-05 |
| 4 | 166395781 | G | A | 6.79379 | 0.490444 | 3.90668 | 9.36E-05 |
| 4 | 172494530 | A | G | 4.93024 | 0.372632 | 4.2814 | 1.86E-05 |
| 5 | 17205027 | C | T | 2.65216 | 0.241358 | 4.04119 | 5.32E-05 |
| 5 | 29729248 | G | A | 7.51472 | 0.513751 | 3.92576 | 8.65E-05 |
| 5 | 29812536 | G | A | 7.51472 | 0.513751 | 3.92576 | 8.65E-05 |
| 5 | 31951961 | T | C | 0.436159 | 0.21128 | -3.92724 | 8.59E-05 |
| 5 | 53929921 | G | A | 0.402235 | 0.23402 | -3.89164 | 9.96E-05 |
| 5 | 67359664 | A | G | 4.32174 | 0.370749 | 3.94785 | 7.89E-05 |
| 5 | 71422999 | C | T | 11.2921 | 0.559904 | 4.3295 | 1.49E-05 |
| 5 | 71469791 | C | T | 3.12771 | 0.284073 | 4.01411 | 5.97E-05 |
| 5 | 71469881 | C | T | 3.12771 | 0.284073 | 4.01411 | 5.97E-05 |
| 5 | 128400356 | C | T | 0.366171 | 0.256161 | -3.92197 | 8.78E-05 |
| 5 | 128400939 | C | T | 0.36887 | 0.256299 | -3.8912 | 9.97E-05 |
| 5 | 128401586 | T | C | 0.390399 | 0.238897 | -3.9372 | 8.24E-05 |
| 5 | 131437532 | G | A | 2.56412 | 0.239719 | 3.92799 | 8.57E-05 |
| 5 | 133285852 | A | G | 2.37373 | 0.216351 | 3.99564 | 6.45E-05 |
| 5 | 133288938 | C | G | 2.38859 | 0.216138 | 4.02848 | 5.61E-05 |
| 5 | 174190638 | G | A | 2.6824 | 0.234939 | 4.19987 | 2.67E-05 |
| 6 | 22687473 | C | G | 5.09665 | 0.399398 | 4.07759 | 4.55E-05 |
| 6 | 22703204 | C | T | 4.6174 | 0.392708 | 3.8956 | 9.80E-05 |
| 6 | 25668075 | C | A | 2.09743 | 0.187152 | 3.95781 | 7.56E-05 |
| 6 | 55134193 | A | G | 4.65569 | 0.365907 | 4.2035 | 2.63E-05 |
| 6 | 55134646 | C | T | 4.65569 | 0.365907 | 4.2035 | 2.63E-05 |
| 6 | 55135391 | T | C | 4.65569 | 0.365907 | 4.2035 | 2.63E-05 |
| 6 | 55136468 | T | C | 4.65569 | 0.365907 | 4.2035 | 2.63E-05 |
| 6 | 55142505 | C | A | 4.96682 | 0.367863 | 4.357 | 1.32E-05 |
| 6 | 56104710 | T | C | 2.82488 | 0.264316 | 3.92888 | 8.53E-05 |
| 6 | 56886646 | G | A | 3.72909 | 0.327608 | 4.0175 | 5.88E-05 |
| 6 | 106955969 | T | C | 2.20386 | 0.201321 | 3.92512 | 8.67E-05 |
| 6 | 122467867 | A | G | 0.464705 | 0.194224 | -3.94571 | 7.96E-05 |
| 6 | 122469276 | T | C | 0.464705 | 0.194224 | -3.94571 | 7.96E-05 |
| 6 | 122490699 | G | A | 0.459728 | 0.195194 | -3.98127 | 6.85E-05 |
| 6 | 122500480 | A | C | 0.443474 | 0.196851 | -4.13061 | 3.62E-05 |
| 6 | 122502217 | C | A | 0.443474 | 0.196851 | -4.13061 | 3.62E-05 |
| 6 | 122505990 | T | C | 0.441623 | 0.197139 | -4.14581 | 3.39E-05 |
| 6 | 122509404 | T | C | 0.445104 | 0.196585 | -4.11754 | 3.83E-05 |
| 6 | 122512179 | C | T | 0.448308 | 0.197121 | -4.06997 | 4.70E-05 |
| 6 | 122515213 | G | A | 0.448308 | 0.197121 | -4.06997 | 4.70E-05 |
| 6 | 122516489 | T | C | 0.448308 | 0.197121 | -4.06997 | 4.70E-05 |
| 6 | 122518557 | T | A | 0.447701 | 0.197185 | -4.07552 | 4.59E-05 |
| 6 | 122523247 | T | G | 0.447701 | 0.197185 | -4.07552 | 4.59E-05 |
| 6 | 122524833 | G | A | 0.447701 | 0.197185 | -4.07552 | 4.59E-05 |
| 6 | 122525011 | C | T | 0.447701 | 0.197185 | -4.07552 | 4.59E-05 |
| 6 | 122525071 | C | A | 0.445556 | 0.195962 | -4.12546 | 3.70E-05 |
| 6 | 122532808 | A | G | 0.448511 | 0.198934 | -4.0306 | 5.56E-05 |
| 6 | 122538063 | C | G | 0.448511 | 0.198934 | -4.0306 | 5.56E-05 |
| 6 | 122538872 | C | T | 0.448511 | 0.198934 | -4.0306 | 5.56E-05 |
| 6 | 122542357 | C | A | 0.462704 | 0.197939 | -3.89345 | 9.88E-05 |
| 6 | 122543921 | C | T | 0.462704 | 0.197939 | -3.89345 | 9.88E-05 |
| 6 | 122545644 | G | A | 0.459834 | 0.198179 | -3.92014 | 8.85E-05 |
| 6 | 122551614 | C | T | 0.464231 | 0.196255 | -3.91007 | 9.23E-05 |
| 6 | 122551929 | A | G | 0.464231 | 0.196255 | -3.91007 | 9.23E-05 |
| 6 | 122552527 | G | T | 0.464231 | 0.196255 | -3.91007 | 9.23E-05 |
| 6 | 122562949 | T | G | 0.462411 | 0.196595 | -3.92331 | 8.73E-05 |
| 6 | 122568325 | A | G | 0.459893 | 0.196806 | -3.94684 | 7.92E-05 |
| 6 | 122570412 | A | G | 2.24197 | 0.196665 | 4.10522 | 4.04E-05 |
| 6 | 122571122 | A | G | 0.43974 | 0.198779 | -4.13309 | 3.58E-05 |
| 6 | 122574069 | G | T | 0.442221 | 0.199019 | -4.09984 | 4.13E-05 |
| 6 | 122577064 | A | G | 0.441251 | 0.198621 | -4.11911 | 3.80E-05 |
| 6 | 122580445 | A | T | 0.44177 | 0.202149 | -4.04141 | 5.31E-05 |
| 6 | 122585224 | T | A | 0.44221 | 0.202507 | -4.02935 | 5.59E-05 |
| 6 | 122585885 | T | C | 0.44221 | 0.202507 | -4.02935 | 5.59E-05 |
| 6 | 122594827 | T | C | 0.448566 | 0.200684 | -3.99484 | 6.47E-05 |
| 6 | 122595208 | A | G | 0.448166 | 0.200301 | -4.00693 | 6.15E-05 |
| 6 | 122596403 | C | A | 0.448566 | 0.200684 | -3.99484 | 6.47E-05 |
| 6 | 122601523 | A | T | 0.446307 | 0.199878 | -4.03621 | 5.43E-05 |
| 6 | 122614761 | T | C | 0.45361 | 0.20134 | -3.92629 | 8.63E-05 |
| 6 | 132338831 | A | T | 2.0577 | 0.174175 | 4.1429 | 3.43E-05 |
| 6 | 132339176 | T | C | 2.0577 | 0.174175 | 4.1429 | 3.43E-05 |
| 6 | 132343184 | A | T | 2.15192 | 0.179693 | 4.26483 | 2.00E-05 |
| 6 | 132344140 | T | C | 2.18146 | 0.180668 | 4.31728 | 1.58E-05 |
| 6 | 132344358 | T | A | 2.15065 | 0.179775 | 4.25962 | 2.05E-05 |
| 6 | 132344668 | G | C | 2.15065 | 0.179775 | 4.25962 | 2.05E-05 |
| 6 | 132345706 | A | G | 2.15065 | 0.179775 | 4.25962 | 2.05E-05 |
| 6 | 132359165 | T | G | 2.05643 | 0.178926 | 4.02943 | 5.59E-05 |
| 6 | 138824122 | T | C | 2.1842 | 0.195426 | 3.99768 | 6.40E-05 |
| 6 | 138824498 | T | C | 2.17117 | 0.197143 | 3.93251 | 8.41E-05 |
| 6 | 148648516 | G | T | 8.85383 | 0.53362 | 4.0869 | 4.37E-05 |
| 7 | 14210254 | T | C | 3.29796 | 0.304026 | 3.92501 | 8.67E-05 |
| 7 | 14210452 | A | G | 3.39518 | 0.303966 | 4.02136 | 5.79E-05 |
| 7 | 14229570 | A | T | 3.62114 | 0.304782 | 4.222 | 2.42E-05 |
| 7 | 46901294 | G | C | 2.20254 | 0.197307 | 4.00194 | 6.28E-05 |
| 7 | 46902512 | A | G | 2.2378 | 0.195106 | 4.12851 | 3.65E-05 |
| 7 | 46903066 | T | C | 2.2378 | 0.195106 | 4.12851 | 3.65E-05 |
| 7 | 46906886 | A | G | 2.24741 | 0.195074 | 4.15113 | 3.31E-05 |
| 7 | 46909143 | C | T | 2.1762 | 0.195599 | 3.97537 | 7.03E-05 |
| 7 | 67511286 | C | T | 8.86696 | 0.557307 | 3.91585 | 9.01E-05 |
| 7 | 67511973 | C | T | 8.86696 | 0.557307 | 3.91585 | 9.01E-05 |
| 7 | 125390190 | C | T | 3.60229 | 0.318701 | 4.02123 | 5.79E-05 |
| 7 | 125391415 | A | C | 3.60229 | 0.318701 | 4.02123 | 5.79E-05 |
| 7 | 125394744 | G | T | 3.55056 | 0.317781 | 3.98736 | 6.68E-05 |
| 7 | 125395594 | C | A | 3.55056 | 0.317781 | 3.98736 | 6.68E-05 |
| 7 | 125399510 | C | A | 3.55056 | 0.317781 | 3.98736 | 6.68E-05 |
| 7 | 125405194 | G | A | 3.46897 | 0.316545 | 3.92948 | 8.51E-05 |
| 7 | 125407753 | C | A | 3.46897 | 0.316545 | 3.92948 | 8.51E-05 |
| 7 | 132811826 | T | A | 4.47179 | 0.370902 | 4.03824 | 5.39E-05 |
| 8 | 17236464 | A | G | 5.03866 | 0.402411 | 4.01863 | 5.85E-05 |
| 8 | 74255500 | C | A | 0.481875 | 0.181432 | -4.02393 | 5.72E-05 |
| 8 | 74259289 | A | G | 2.03881 | 0.175691 | 4.05466 | 5.02E-05 |
| 8 | 92210548 | G | C | 19.1806 | 0.735574 | 4.01578 | 5.93E-05 |
| 8 | 99067125 | G | A | 3.41564 | 0.304281 | 4.03694 | 5.42E-05 |
| 8 | 109365674 | G | A | 3.25282 | 0.298483 | 3.95173 | 7.76E-05 |
| 8 | 109377540 | C | T | 3.25282 | 0.298483 | 3.95173 | 7.76E-05 |
| 8 | 109380911 | A | C | 3.25282 | 0.298483 | 3.95173 | 7.76E-05 |
| 8 | 109380948 | T | A | 3.25282 | 0.298483 | 3.95173 | 7.76E-05 |
| 8 | 109384403 | G | A | 3.25282 | 0.298483 | 3.95173 | 7.76E-05 |
| 8 | 109389968 | C | T | 3.25282 | 0.298483 | 3.95173 | 7.76E-05 |
| 8 | 109392194 | G | A | 3.25282 | 0.298483 | 3.95173 | 7.76E-05 |
| 8 | 109407212 | A | C | 3.33727 | 0.299558 | 4.0231 | 5.74E-05 |
| 8 | 109414614 | A | G | 3.23719 | 0.298733 | 3.93229 | 8.41E-05 |
| 8 | 109419890 | A | G | 3.23719 | 0.298733 | 3.93229 | 8.41E-05 |
| 8 | 109427642 | C | T | 3.36901 | 0.295074 | 4.11632 | 3.85E-05 |
| 8 | 109427695 | C | T | 3.36901 | 0.295074 | 4.11632 | 3.85E-05 |
| 8 | 109428711 | G | A | 3.36901 | 0.295074 | 4.11632 | 3.85E-05 |
| 8 | 109431586 | G | A | 3.23719 | 0.298733 | 3.93229 | 8.41E-05 |
| 8 | 109432292 | T | C | 3.34589 | 0.294749 | 4.0975 | 4.18E-05 |
| 8 | 109433868 | T | C | 3.28035 | 0.299773 | 3.96282 | 7.41E-05 |
| 8 | 109440670 | A | G | 3.21367 | 0.298347 | 3.91294 | 9.12E-05 |
| 8 | 109447244 | A | T | 3.36727 | 0.299555 | 4.05302 | 5.06E-05 |
| 8 | 109447902 | T | C | 3.50539 | 0.296081 | 4.23635 | 2.27E-05 |
| 8 | 109449166 | G | A | 3.59476 | 0.297531 | 4.30031 | 1.71E-05 |
| 8 | 109457818 | C | A | 3.59476 | 0.297531 | 4.30031 | 1.71E-05 |
| 8 | 109467212 | T | C | 3.59476 | 0.297531 | 4.30031 | 1.71E-05 |
| 8 | 109469075 | C | T | 3.59476 | 0.297531 | 4.30031 | 1.71E-05 |
| 8 | 109475516 | G | A | 3.59476 | 0.297531 | 4.30031 | 1.71E-05 |
| 8 | 109479484 | T | G | 3.59476 | 0.297531 | 4.30031 | 1.71E-05 |
| 8 | 109480284 | A | G | 3.45419 | 0.301021 | 4.11795 | 3.82E-05 |
| 8 | 109488647 | A | C | 3.59476 | 0.297531 | 4.30031 | 1.71E-05 |
| 8 | 109496490 | A | G | 3.52607 | 0.296884 | 4.2447 | 2.19E-05 |
| 8 | 109497591 | A | G | 3.52607 | 0.296884 | 4.2447 | 2.19E-05 |
| 8 | 109505168 | G | A | 3.38791 | 0.300421 | 4.06167 | 4.87E-05 |
| 8 | 109506777 | C | T | 3.38791 | 0.300421 | 4.06167 | 4.87E-05 |
| 8 | 109509262 | A | G | 3.38791 | 0.300421 | 4.06167 | 4.87E-05 |
| 8 | 109526708 | A | G | 3.38791 | 0.300421 | 4.06167 | 4.87E-05 |
| 8 | 109529861 | T | G | 3.38791 | 0.300421 | 4.06167 | 4.87E-05 |
| 8 | 109530802 | T | A | 3.38791 | 0.300421 | 4.06167 | 4.87E-05 |
| 8 | 109535269 | T | C | 3.38791 | 0.300421 | 4.06167 | 4.87E-05 |
| 8 | 109539030 | G | C | 3.38791 | 0.300421 | 4.06167 | 4.87E-05 |
| 8 | 109546632 | A | T | 3.45305 | 0.301102 | 4.11574 | 3.86E-05 |
| 8 | 109557054 | A | C | 3.45305 | 0.301102 | 4.11574 | 3.86E-05 |
| 8 | 109565604 | C | T | 3.56433 | 0.302664 | 4.19929 | 2.68E-05 |
| 8 | 109566800 | C | T | 3.56433 | 0.302664 | 4.19929 | 2.68E-05 |
| 8 | 109567357 | T | A | 3.56433 | 0.302664 | 4.19929 | 2.68E-05 |
| 8 | 109570280 | A | G | 3.4783 | 0.300967 | 4.1418 | 3.45E-05 |
| 8 | 109573254 | A | G | 3.37769 | 0.300141 | 4.05541 | 5.00E-05 |
| 8 | 109574453 | T | C | 3.37769 | 0.300141 | 4.05541 | 5.00E-05 |
| 8 | 109575346 | C | A | 3.37769 | 0.300141 | 4.05541 | 5.00E-05 |
| 8 | 109584638 | A | G | 3.37769 | 0.300141 | 4.05541 | 5.00E-05 |
| 8 | 109585598 | C | A | 3.37769 | 0.300141 | 4.05541 | 5.00E-05 |
| 8 | 109587524 | T | C | 3.37769 | 0.300141 | 4.05541 | 5.00E-05 |
| 8 | 109587555 | C | A | 3.3784 | 0.295108 | 4.12528 | 3.70E-05 |
| 8 | 110000597 | G | A | 3.25066 | 0.286171 | 4.11942 | 3.80E-05 |
| 8 | 110016563 | T | C | 3.23716 | 0.280117 | 4.19359 | 2.75E-05 |
| 8 | 110025863 | T | C | 3.2047 | 0.286067 | 4.07114 | 4.68E-05 |
| 8 | 110026102 | C | T | 3.2047 | 0.286067 | 4.07114 | 4.68E-05 |
| 8 | 110027042 | C | T | 3.2047 | 0.286067 | 4.07114 | 4.68E-05 |
| 8 | 110034248 | C | T | 3.16683 | 0.29408 | 3.91979 | 8.86E-05 |
| 8 | 110035081 | T | C | 3.16683 | 0.29408 | 3.91979 | 8.86E-05 |
| 8 | 110050739 | T | G | 3.16683 | 0.29408 | 3.91979 | 8.86E-05 |
| 8 | 110051431 | C | T | 3.16683 | 0.29408 | 3.91979 | 8.86E-05 |
| 8 | 110053266 | A | G | 3.13865 | 0.293823 | 3.8928 | 9.91E-05 |
| 8 | 110057109 | C | T | 3.13865 | 0.293823 | 3.8928 | 9.91E-05 |
| 8 | 110063557 | T | C | 3.13865 | 0.293823 | 3.8928 | 9.91E-05 |
| 8 | 110068164 | G | T | 3.16107 | 0.28917 | 3.98005 | 6.89E-05 |
| 8 | 110074896 | T | C | 3.16107 | 0.28917 | 3.98005 | 6.89E-05 |
| 8 | 124527879 | T | A | 2.77288 | 0.262071 | 3.89164 | 9.96E-05 |
| 8 | 124528839 | C | T | 2.77288 | 0.262071 | 3.89164 | 9.96E-05 |
| 8 | 124531898 | A | G | 2.77288 | 0.262071 | 3.89164 | 9.96E-05 |
| 8 | 139529349 | C | T | 4.97371 | 0.387763 | 4.13698 | 3.52E-05 |
| 9 | 1702356 | T | A | 6.21886 | 0.423692 | 4.31348 | 1.61E-05 |
| 9 | 7863219 | C | A | 3.8958 | 0.333351 | 4.07948 | 4.51E-05 |
| 9 | 7866008 | G | A | 4.08339 | 0.335956 | 4.18783 | 2.82E-05 |
| 9 | 23252596 | G | A | 9.82837 | 0.567503 | 4.02689 | 5.65E-05 |
| 9 | 27058578 | G | A | 9.48295 | 0.569695 | 3.9486 | 7.86E-05 |
| 9 | 27077418 | G | A | 7.66522 | 0.476306 | 4.27602 | 1.90E-05 |
| 9 | 78139977 | A | T | 0.465065 | 0.188349 | -4.06468 | 4.81E-05 |
| 9 | 79748222 | A | G | 9.81832 | 0.565222 | 4.04134 | 5.31E-05 |
| 9 | 79979110 | G | C | 10.9691 | 0.576894 | 4.15168 | 3.30E-05 |
| 9 | 79982819 | T | C | 10.9691 | 0.576894 | 4.15168 | 3.30E-05 |
| 9 | 79986015 | A | G | 8.87455 | 0.553964 | 3.94103 | 8.11E-05 |
| 9 | 79991178 | G | A | 10.9691 | 0.576894 | 4.15168 | 3.30E-05 |
| 9 | 79997658 | G | C | 10.9691 | 0.576894 | 4.15168 | 3.30E-05 |
| 9 | 80003740 | A | C | 10.9691 | 0.576894 | 4.15168 | 3.30E-05 |
| 9 | 80004033 | T | C | 10.9691 | 0.576894 | 4.15168 | 3.30E-05 |
| 9 | 80005488 | G | A | 10.9691 | 0.576894 | 4.15168 | 3.30E-05 |
| 9 | 80008717 | G | A | 10.9691 | 0.576894 | 4.15168 | 3.30E-05 |
| 9 | 80012372 | A | G | 10.9691 | 0.576894 | 4.15168 | 3.30E-05 |
| 9 | 80012529 | G | C | 10.9691 | 0.576894 | 4.15168 | 3.30E-05 |
| 9 | 80013222 | G | A | 10.9691 | 0.576894 | 4.15168 | 3.30E-05 |
| 9 | 80014496 | G | A | 10.9691 | 0.576894 | 4.15168 | 3.30E-05 |
| 9 | 80017364 | A | G | 10.9691 | 0.576894 | 4.15168 | 3.30E-05 |
| 9 | 80019784 | C | G | 10.9691 | 0.576894 | 4.15168 | 3.30E-05 |
| 9 | 80020874 | C | A | 9.81832 | 0.565222 | 4.04134 | 5.31E-05 |
| 9 | 80034049 | G | A | 10.9691 | 0.576894 | 4.15168 | 3.30E-05 |
| 9 | 80035189 | T | G | 10.9691 | 0.576894 | 4.15168 | 3.30E-05 |
| 9 | 80036547 | A | G | 10.9691 | 0.576894 | 4.15168 | 3.30E-05 |
| 9 | 82093030 | A | G | 2.51861 | 0.233352 | 3.95842 | 7.54E-05 |
| 9 | 82096194 | A | G | 2.51861 | 0.233352 | 3.95842 | 7.54E-05 |
| 9 | 82116433 | A | T | 2.42574 | 0.225785 | 3.92469 | 8.68E-05 |
| 9 | 82121130 | A | G | 3.12723 | 0.230693 | 4.94228 | 7.72E-07 |
| 9 | 82124212 | G | T | 3.13903 | 0.230623 | 4.9601 | 7.05E-07 |
| 9 | 88123711 | G | A | 6.96112 | 0.482439 | 4.02194 | 5.77E-05 |
| 9 | 88124745 | A | T | 6.96112 | 0.482439 | 4.02194 | 5.77E-05 |
| 9 | 110376654 | T | C | 0.425718 | 0.207087 | -4.12377 | 3.73E-05 |
| 9 | 110376990 | C | G | 0.426567 | 0.207075 | -4.11439 | 3.88E-05 |
| 9 | 132310862 | C | T | 9.46237 | 0.559902 | 4.01378 | 5.98E-05 |
| 10 | 21578237 | C | A | 4.77387 | 0.325646 | 4.80017 | 1.59E-06 |
| 10 | 21578879 | T | G | 4.77387 | 0.325646 | 4.80017 | 1.59E-06 |
| 10 | 21579931 | G | A | 4.14526 | 0.334014 | 4.2572 | 2.07E-05 |
| 10 | 21585486 | C | T | 4.00409 | 0.332289 | 4.17503 | 2.98E-05 |
| 10 | 21585504 | G | T | 4.00409 | 0.332289 | 4.17503 | 2.98E-05 |
| 10 | 21590454 | G | A | 4.76868 | 0.366992 | 4.25641 | 2.08E-05 |
| 10 | 21594723 | T | A | 3.90458 | 0.331075 | 4.11433 | 3.88E-05 |
| 10 | 21595007 | T | A | 3.80551 | 0.330186 | 4.04757 | 5.18E-05 |
| 10 | 21609434 | A | T | 3.73081 | 0.329278 | 3.99852 | 6.37E-05 |
| 10 | 21609627 | G | A | 3.73081 | 0.329278 | 3.99852 | 6.37E-05 |
| 10 | 21610946 | T | A | 3.73081 | 0.329278 | 3.99852 | 6.37E-05 |
| 10 | 21616470 | T | C | 3.66435 | 0.328477 | 3.95355 | 7.70E-05 |
| 10 | 44685402 | T | C | 4.32562 | 0.350226 | 4.18175 | 2.89E-05 |
| 10 | 44690235 | G | A | 4.26092 | 0.360892 | 4.0164 | 5.91E-05 |
| 10 | 44702681 | T | A | 3.71838 | 0.323635 | 4.05793 | 4.95E-05 |
| 10 | 62058259 | G | A | 4.81752 | 0.378273 | 4.15641 | 3.23E-05 |
| 10 | 63748961 | T | G | 3.53868 | 0.319796 | 3.95176 | 7.76E-05 |
| 10 | 63756491 | G | A | 2.67219 | 0.225482 | 4.35911 | 1.31E-05 |
| 10 | 88203208 | C | T | 4.79999 | 0.384004 | 4.08489 | 4.41E-05 |
| 10 | 88224397 | C | T | 4.36446 | 0.373697 | 3.94302 | 8.05E-05 |
| 10 | 88237673 | G | A | 4.36446 | 0.373697 | 3.94302 | 8.05E-05 |
| 10 | 88241482 | A | C | 4.36446 | 0.373697 | 3.94302 | 8.05E-05 |
| 10 | 88245247 | T | C | 4.56183 | 0.375901 | 4.03756 | 5.40E-05 |
| 10 | 88266912 | G | T | 4.54354 | 0.38019 | 3.98145 | 6.85E-05 |
| 10 | 95792282 | C | A | 4.6795 | 0.368998 | 4.18211 | 2.89E-05 |
| 10 | 95808789 | G | T | 5.62757 | 0.419757 | 4.1159 | 3.86E-05 |
| 10 | 107761726 | G | C | 4.44302 | 0.370511 | 4.02508 | 5.70E-05 |
| 10 | 108096203 | A | G | 2.81732 | 0.266156 | 3.89164 | 9.96E-05 |
| 10 | 129247813 | A | C | 3.38966 | 0.291163 | 4.1926 | 2.76E-05 |
| 11 | 11818781 | G | T | 3.6979 | 0.32591 | 4.01266 | 6.00E-05 |
| 11 | 11825323 | C | A | 3.83551 | 0.327275 | 4.10756 | 4.00E-05 |
| 11 | 23935512 | C | T | 6.96671 | 0.451881 | 4.29569 | 1.74E-05 |
| 11 | 26753745 | G | A | 5.72915 | 0.447293 | 3.90251 | 9.52E-05 |
| 11 | 63697763 | A | T | 3.10911 | 0.270472 | 4.19391 | 2.74E-05 |
| 11 | 63702910 | A | G | 3.32284 | 0.277977 | 4.31985 | 1.56E-05 |
| 11 | 63706276 | G | A | 3.63277 | 0.239727 | 5.38112 | 7.40E-08 |
| 11 | 63710016 | G | A | 3.70494 | 0.233877 | 5.59981 | 2.15E-08 |
| 11 | 63716240 | C | T | 3.56312 | 0.237668 | 5.34627 | 8.98E-08 |
| 11 | 63725609 | G | A | 3.35548 | 0.241262 | 5.01776 | 5.23E-07 |
| 11 | 63726689 | C | T | 3.51627 | 0.24146 | 5.20749 | 1.91E-07 |
| 11 | 63727898 | G | A | 3.35548 | 0.241262 | 5.01776 | 5.23E-07 |
| 11 | 63728923 | G | A | 3.51627 | 0.24146 | 5.20749 | 1.91E-07 |
| 11 | 63730581 | C | T | 3.35548 | 0.241262 | 5.01776 | 5.23E-07 |
| 11 | 63731061 | A | G | 3.35548 | 0.241262 | 5.01776 | 5.23E-07 |
| 11 | 63731628 | C | A | 3.35548 | 0.241262 | 5.01776 | 5.23E-07 |
| 11 | 63735962 | G | A | 3.34978 | 0.241049 | 5.01513 | 5.30E-07 |
| 11 | 63736601 | G | A | 3.85167 | 0.297264 | 4.53639 | 5.72E-06 |
| 11 | 63737811 | T | G | 3.44963 | 0.240235 | 5.15439 | 2.54E-07 |
| 11 | 63739568 | A | G | 3.46703 | 0.240255 | 5.17491 | 2.28E-07 |
| 11 | 63744750 | G | T | 3.27119 | 0.236462 | 5.01203 | 5.39E-07 |
| 11 | 63752165 | A | G | 3.27119 | 0.236462 | 5.01203 | 5.39E-07 |
| 11 | 63754548 | C | T | 3.3257 | 0.229233 | 5.24217 | 1.59E-07 |
| 11 | 63755961 | A | G | 3.27119 | 0.236462 | 5.01203 | 5.39E-07 |
| 11 | 63764302 | G | C | 3.25642 | 0.236489 | 4.99232 | 5.97E-07 |
| 11 | 63768331 | G | A | 3.37207 | 0.239619 | 5.07275 | 3.92E-07 |
| 11 | 63770020 | T | C | 3.16585 | 0.250843 | 4.5942 | 4.34E-06 |
| 11 | 63774301 | C | T | 3.16523 | 0.23941 | 4.81277 | 1.49E-06 |
| 11 | 63774370 | C | A | 3.13084 | 0.239209 | 4.77115 | 1.83E-06 |
| 11 | 63774487 | T | C | 3.15598 | 0.232736 | 4.93821 | 7.88E-07 |
| 11 | 63778845 | G | A | 3.21094 | 0.228241 | 5.1111 | 3.20E-07 |
| 11 | 63778914 | A | C | 3.13531 | 0.226683 | 5.04109 | 4.63E-07 |
| 11 | 80495932 | T | C | 12.9079 | 0.632927 | 4.04128 | 5.32E-05 |
| 11 | 81602523 | T | A | 4.66291 | 0.373769 | 4.11923 | 3.80E-05 |
| 11 | 97067154 | A | G | 2.18638 | 0.17873 | 4.37669 | 1.20E-05 |
| 11 | 109025221 | T | C | 3.19808 | 0.288164 | 4.03433 | 5.48E-05 |
| 11 | 109026883 | A | G | 3.19808 | 0.288164 | 4.03433 | 5.48E-05 |
| 11 | 120736087 | C | T | 2.10656 | 0.187856 | 3.96611 | 7.31E-05 |
| 12 | 19103960 | T | G | 7.70855 | 0.524794 | 3.89168 | 9.96E-05 |
| 12 | 19513866 | C | T | 2.08385 | 0.182712 | 4.01844 | 5.86E-05 |
| 12 | 19515698 | C | A | 2.08937 | 0.18297 | 4.02723 | 5.64E-05 |
| 12 | 24230977 | T | G | 5.23116 | 0.401928 | 4.11674 | 3.84E-05 |
| 12 | 24230981 | C | A | 5.23116 | 0.401928 | 4.11674 | 3.84E-05 |
| 12 | 24261884 | T | C | 4.36431 | 0.367885 | 4.00522 | 6.20E-05 |
| 12 | 39601559 | G | A | 7.31379 | 0.45363 | 4.38631 | 1.15E-05 |
| 12 | 63158954 | T | C | 4.82917 | 0.393417 | 4.00256 | 6.27E-05 |
| 12 | 74749858 | T | C | 2.04435 | 0.183448 | 3.89801 | 9.70E-05 |
| 12 | 91280070 | T | C | 3.34154 | 0.268718 | 4.48958 | 7.14E-06 |
| 12 | 96401252 | G | A | 8.10386 | 0.525082 | 3.98479 | 6.75E-05 |
| 12 | 96433375 | G | C | 7.57019 | 0.519354 | 3.89757 | 9.72E-05 |
| 12 | 114258991 | C | G | 3.49696 | 0.320858 | 3.90171 | 9.55E-05 |
| 12 | 117326854 | C | T | 2.03831 | 0.177265 | 4.01725 | 5.89E-05 |
| 12 | 130493405 | C | T | 2.73755 | 0.258136 | 3.90129 | 9.57E-05 |
| 13 | 25927228 | C | T | 5.68378 | 0.410384 | 4.23412 | 2.29E-05 |
| 13 | 25930143 | T | A | 4.84503 | 0.402295 | 3.92238 | 8.77E-05 |
| 13 | 28987092 | T | C | 7.21059 | 0.47995 | 4.11616 | 3.85E-05 |
| 13 | 30684241 | A | G | 2.13333 | 0.183829 | 4.12169 | 3.76E-05 |
| 13 | 34699539 | A | G | 3.67416 | 0.3317 | 3.92319 | 8.74E-05 |
| 13 | 46701206 | G | A | 13.4515 | 0.564667 | 4.60287 | 4.17E-06 |
| 13 | 70086267 | T | C | 5.83012 | 0.447229 | 3.94213 | 8.08E-05 |
| 13 | 70089325 | C | A | 5.83012 | 0.447229 | 3.94213 | 8.08E-05 |
| 13 | 70104252 | C | A | 5.83012 | 0.447229 | 3.94213 | 8.08E-05 |
| 13 | 108722351 | C | T | 3.80428 | 0.306448 | 4.36005 | 1.30E-05 |
| 14 | 69409135 | G | A | 2.09139 | 0.189092 | 3.90198 | 9.54E-05 |
| 14 | 69409556 | T | A | 2.09139 | 0.189092 | 3.90198 | 9.54E-05 |
| 14 | 69414322 | G | A | 2.07157 | 0.179231 | 4.06352 | 4.83E-05 |
| 14 | 91130710 | A | T | 2.13822 | 0.191044 | 3.97801 | 6.95E-05 |
| 14 | 91130763 | G | A | 2.13822 | 0.191044 | 3.97801 | 6.95E-05 |
| 14 | 91131905 | C | T | 2.13822 | 0.191044 | 3.97801 | 6.95E-05 |
| 14 | 91131965 | C | T | 2.13822 | 0.191044 | 3.97801 | 6.95E-05 |
| 14 | 91134900 | C | T | 2.12254 | 0.19121 | 3.93606 | 8.28E-05 |
| 14 | 98214713 | A | C | 5.39351 | 0.397662 | 4.23776 | 2.26E-05 |
| 14 | 101943950 | T | C | 2.061 | 0.184036 | 3.92961 | 8.51E-05 |
| 14 | 101943953 | G | A | 2.10191 | 0.185627 | 4.00184 | 6.29E-05 |
| 15 | 39974327 | T | C | 4.10153 | 0.35695 | 3.95394 | 7.69E-05 |
| 15 | 39999170 | T | C | 4.44337 | 0.376797 | 3.95813 | 7.55E-05 |
| 15 | 40011074 | C | A | 4.44337 | 0.376797 | 3.95813 | 7.55E-05 |
| 15 | 84310603 | A | G | 6.1573 | 0.458817 | 3.96157 | 7.45E-05 |
| 15 | 87079487 | A | C | 4.01569 | 0.349166 | 3.98152 | 6.85E-05 |
| 15 | 87081003 | A | G | 4.01569 | 0.349166 | 3.98152 | 6.85E-05 |
| 15 | 87081291 | C | T | 4.23146 | 0.35354 | 4.08029 | 4.50E-05 |
| 15 | 87081386 | A | T | 4.01569 | 0.349166 | 3.98152 | 6.85E-05 |
| 15 | 87096396 | A | G | 4.31722 | 0.354099 | 4.13051 | 3.62E-05 |
| 15 | 87099931 | A | C | 3.49255 | 0.310893 | 4.02271 | 5.75E-05 |
| 15 | 87107429 | A | G | 6.06354 | 0.424665 | 4.24404 | 2.20E-05 |
| 15 | 87112667 | C | T | 5.5096 | 0.419828 | 4.06475 | 4.81E-05 |
| 17 | 32428203 | C | T | 3.47076 | 0.316603 | 3.9304 | 8.48E-05 |
| 17 | 32432996 | C | T | 3.47076 | 0.316603 | 3.9304 | 8.48E-05 |
| 17 | 32436442 | C | T | 3.47076 | 0.316603 | 3.9304 | 8.48E-05 |
| 17 | 32437524 | G | A | 3.56645 | 0.31781 | 4.00104 | 6.31E-05 |
| 17 | 32437738 | C | T | 3.56645 | 0.31781 | 4.00104 | 6.31E-05 |
| 17 | 32440221 | G | A | 3.56645 | 0.31781 | 4.00104 | 6.31E-05 |
| 17 | 32444636 | A | G | 3.56645 | 0.31781 | 4.00104 | 6.31E-05 |
| 17 | 32446562 | G | A | 3.56645 | 0.31781 | 4.00104 | 6.31E-05 |
| 17 | 32446620 | T | C | 3.56645 | 0.31781 | 4.00104 | 6.31E-05 |
| 17 | 32446621 | T | C | 3.56645 | 0.31781 | 4.00104 | 6.31E-05 |
| 17 | 76480355 | A | G | 0.478471 | 0.188564 | -3.90934 | 9.25E-05 |
| 17 | 76480707 | C | T | 0.471076 | 0.190875 | -3.94361 | 8.03E-05 |
| 17 | 76480774 | G | A | 0.471568 | 0.190435 | -3.94723 | 7.91E-05 |
| 18 | 22811960 | C | T | 2.15733 | 0.194884 | 3.94527 | 7.97E-05 |
| 18 | 22812508 | C | T | 2.13176 | 0.192951 | 3.923 | 8.75E-05 |
| 18 | 40545122 | A | G | 2.12818 | 0.190416 | 3.96641 | 7.30E-05 |
| 18 | 40571210 | T | A | 2.20356 | 0.185965 | 4.24852 | 2.15E-05 |
| 18 | 40576364 | T | G | 2.21515 | 0.186226 | 4.27071 | 1.95E-05 |
| 18 | 40589804 | A | G | 2.12065 | 0.183618 | 4.09395 | 4.24E-05 |
| 18 | 40591274 | T | C | 2.13699 | 0.184225 | 4.12212 | 3.75E-05 |
| 18 | 40601707 | C | T | 2.13112 | 0.182281 | 4.15099 | 3.31E-05 |
| 18 | 40607971 | A | G | 2.20395 | 0.18651 | 4.23705 | 2.26E-05 |
| 18 | 40609618 | A | T | 2.24531 | 0.188108 | 4.29989 | 1.71E-05 |
| 18 | 40613338 | T | C | 2.2052 | 0.186441 | 4.24164 | 2.22E-05 |
| 18 | 40613347 | C | T | 2.2052 | 0.186441 | 4.24164 | 2.22E-05 |
| 18 | 40613548 | C | T | 2.2052 | 0.186441 | 4.24164 | 2.22E-05 |
| 18 | 40622639 | C | T | 1.98826 | 0.176374 | 3.89661 | 9.75E-05 |
| 18 | 40626722 | G | A | 2.02618 | 0.175473 | 4.02428 | 5.72E-05 |
| 19 | 2546983 | G | A | 8.75195 | 0.541466 | 4.0063 | 6.17E-05 |
| 19 | 5253796 | C | A | 2.24657 | 0.199759 | 4.05192 | 5.08E-05 |
| 19 | 7734511 | G | A | 0.441294 | 0.207452 | -3.94329 | 8.04E-05 |
| 19 | 10432919 | C | T | 0.365395 | 0.254387 | -3.95766 | 7.57E-05 |
| 19 | 10548881 | C | T | 0.349536 | 0.267936 | -3.92314 | 8.74E-05 |
| 19 | 10579474 | T | G | 0.400427 | 0.233738 | -3.91559 | 9.02E-05 |
| 19 | 10585035 | G | C | 0.299479 | 0.292 | -4.12915 | 3.64E-05 |
| 19 | 10585089 | G | A | 0.318642 | 0.283059 | -4.04046 | 5.33E-05 |
| 19 | 10585233 | A | G | 0.342155 | 0.275565 | -3.89198 | 9.94E-05 |
| 19 | 10587596 | C | T | 0.335935 | 0.260576 | -4.18626 | 2.84E-05 |
| 19 | 11659710 | A | C | 2.63251 | 0.244213 | 3.96349 | 7.39E-05 |
| 19 | 11659930 | G | A | 2.5759 | 0.241267 | 3.9218 | 8.79E-05 |
| 19 | 11661890 | G | A | 2.5759 | 0.241267 | 3.9218 | 8.79E-05 |
| 19 | 11662862 | G | A | 2.73208 | 0.240767 | 4.17441 | 2.99E-05 |
| 19 | 11664068 | G | A | 2.73208 | 0.240767 | 4.17441 | 2.99E-05 |
| 19 | 11671204 | G | A | 2.73208 | 0.240767 | 4.17441 | 2.99E-05 |
| 19 | 11676832 | C | T | 2.70899 | 0.240658 | 4.14106 | 3.46E-05 |
| 19 | 11677999 | C | T | 2.70899 | 0.240658 | 4.14106 | 3.46E-05 |
| 19 | 13292745 | C | T | 2.07874 | 0.187088 | 3.91132 | 9.18E-05 |
| 19 | 15588317 | G | A | 4.89637 | 0.38804 | 4.09363 | 4.25E-05 |
| 19 | 31242778 | G | A | 2.48581 | 0.233822 | 3.8944 | 9.84E-05 |
| 19 | 31249831 | C | T | 2.48581 | 0.233822 | 3.8944 | 9.84E-05 |
| 19 | 31250953 | T | C | 2.61373 | 0.233027 | 4.12303 | 3.74E-05 |
| 19 | 31260464 | C | T | 2.48484 | 0.23246 | 3.91555 | 9.02E-05 |
| 22 | 28336162 | A | G | 2.94856 | 0.231788 | 4.6651 | 3.08E-06 |
| 22 | 28459665 | G | A | 2.60785 | 0.244588 | 3.91894 | 8.89E-05 |
| 22 | 36905776 | G | A | 2.15921 | 0.197077 | 3.90581 | 9.39E-05 |
| 22 | 42782331 | G | A | 3.16663 | 0.274837 | 4.19401 | 2.74E-05 |
| 22 | 42801817 | G | A | 3.63962 | 0.284443 | 4.54179 | 5.58E-06 |
| 22 | 42805799 | G | A | 3.42725 | 0.287108 | 4.29023 | 1.78E-05 |

**Supplementary table 3: Decile bin-wise percentage of Groups A,B,C samples in each decile bin**

| **CAD-PRS Decile bin** | **GroupA.sample%** | **GroupB.sample%** | **GroupC.sample%** |
| --- | --- | --- | --- |
| 1 | 21.87 | 11.72 | 59.38 |
| 2 | 26.06 | 11.27 | 57.04 |
| 3 | 26.28 | 12.82 | 56.41 |
| 4 | 35.44 | 12.66 | 45.57 |
| 5 | 38.46 | 13.46 | 44.87 |
| 6 | 37.95 | 10.26 | 48.20 |
| 7 | 42.60 | 14.35 | 40.35 |
| 8 | 39.29 | 12.24 | 43.37 |
| 9 | 45.56 | 16.67 | 32.22 |
| 10 | 56.01 | 15.51 | 24.68 |

**Supplementary table 4: Percentage of AKI and no-AKI samples from Groups A samples in each decile bin**

| **CAD-PRS Decile bin** | **GroupA_AKI.sample%** | **GroupA_noAKI.sample%** |
| --- | --- | --- |
| 1 | 2.50% | 4.04% |
| 2 | 7.50% | 4.49% |
| 3 | 8.75% | 4.94% |
| 4 | 6.25% | 7.04% |
| 5 | 6.25% | 7.93% |
| 6 | 8.75% | 10.03% |
| 7 | 12.50% | 11.98% |
| 8 | 10.00% | 10.18% |
| 9 | 15.00% | 16.17% |
| 10 | 22.50% | 23.20% |

**Supplementary figure 1: The Q-Q plot**


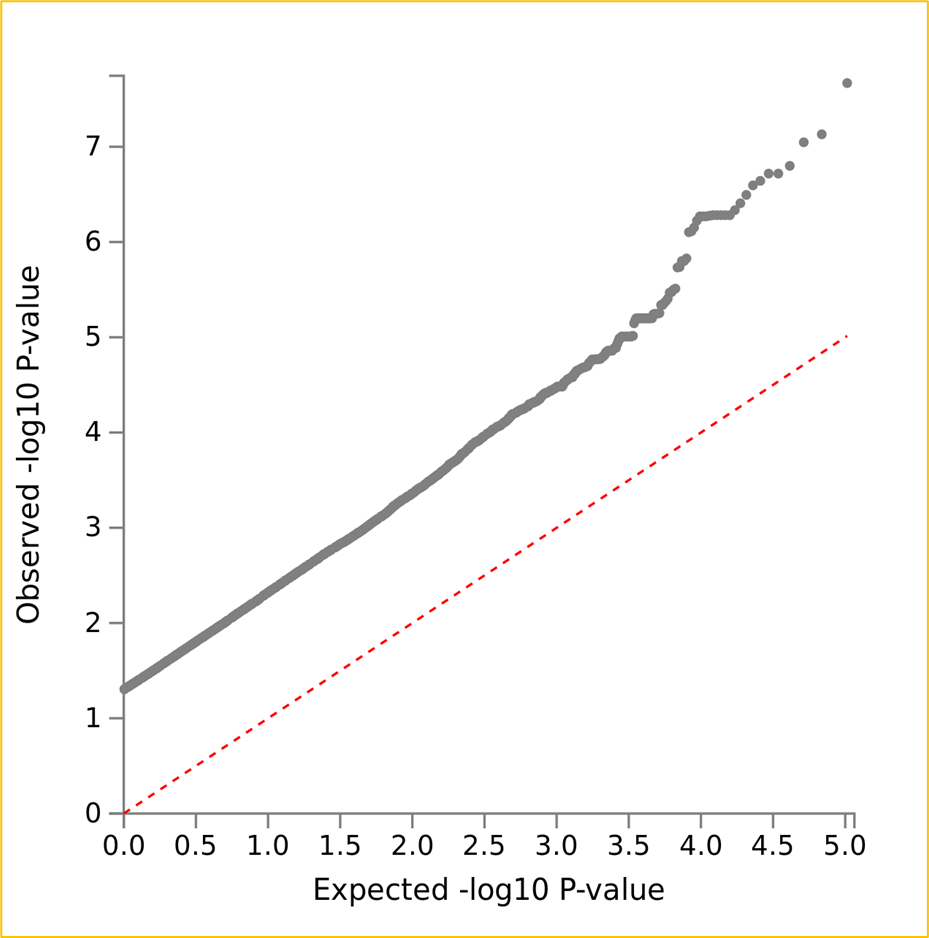

Supplement: Supplementary file 1 [file 5700ff55fd0c58eea34638fa.docx]
